# Supplementary material
Source: PubMed Central journal article supplement (PMC8789344)
Supplement: NIHMS1701877-supplement-Supplemental_Publication_Material.pdf [file NIHMS1701877-supplement-Supplemental_Publication_Material.pdf]

**Supplemental Material**

Supplemental Table I: Demographic Summary by Excluded versus Included

| Variable                                                           | Level                      | Excluded (n=236)                              | Included (n=912)                               | p-value |
|--------------------------------------------------------------------|----------------------------|-----------------------------------------------|------------------------------------------------|---------|
| Age                                                                | Mean (SD)                  | 58.4 (11.4)                                   | 59.2 (11)                                      | 0.3124  |
| Waist Circumference (cm)                                           | Mean (SD)<br>(min, max)    | missing=3<br>103.6 (15.6)<br>(63, 149)        | missing=0<br>99.7 (15.6)<br>(56, 244)          | 0.0008  |
| Low Density Lipoprotein (mg/dL)                                    | Mean (SD)<br>(min, max)    | missing=103<br>126 (35.6)<br>(48, 277)        | missing=0<br>125.8 (35.9)<br>(22, 318)         | 0.9745  |
| Estimated Glomerular Filtration Rate (ml/min/1.73 m <sup>2</sup> ) | Mean (SD)<br>(min, max)    | missing=16<br>85.1 (19.8)<br>(19.2, 149.4)    | missing=0<br>84.4 (18.6)<br>(5, 192)           | 0.6284  |
| Systolic Blood Pressure (mmHg)                                     | Mean (SD)<br>(min, max)    | missing=5<br>128.3 (15.2)<br>(97.5, 176.6)    | missing=0<br>128 (15.9)<br>(91, 221.7)         | 0.8264  |
| Diastolic Blood Pressure (mmHg)                                    | Mean (SD)<br>(min, max)    | missing=5<br>74.2 (9.1)<br>(52.7, 100)        | missing=0<br>74.5 (8.3)<br>(47.7, 106.6)       | 0.5993  |
| Awake Systolic Blood Pressure (mmHg)                               | Mean (SD)<br>(min, max)    | missing=3<br>130.9 (15.1)<br>(97.1, 176.5)    | missing=0<br>129.2 (13.3)<br>(94.8, 188.8)     | 0.0921  |
| Awake Diastolic Blood Pressure (mmHg)                              | Mean (SD)<br>(min, max)    | missing=3<br>78.3 (10.4)<br>(51.4, 104.8)     | missing=0<br>77.9 (9.2)<br>(51.5, 109.4)       | 0.5071  |
| Asleep Systolic Blood Pressure (mmHg)                              | Mean (SD)<br>(min, max)    | missing=74<br>126.2 (18.7)<br>(89.3, 182)     | missing=0<br>120.4 (15.3)<br>(80.8, 192.2)     | <.0001  |
| Asleep Diastolic Blood Pressure (mmHg)                             | Mean (SD)<br>(min, max)    | missing=74<br>71.1 (13.4)<br>(43, 136)        | missing=0<br>68.1 (9.6)<br>(44.4, 109.2)       | 0.0007  |
| Percent (%) dipping                                                | Mean (SD)<br>(min, max)    | missing=74<br>0 (0.1)<br>(-0.4, 0.3)          | missing=0<br>0.1 (0.1)<br>(-0.4, 0.3)          | <.0001  |
| Plasma Aldosterone (ng/dL)                                         | Median [IQR]<br>(min, max) | missing=15<br>4.7 (3, 8.9)<br>(1.9, 40.8)     | missing=0<br>4.5 (3, 7.3)<br>(1.9, 61.1)       | 0.1038  |
| Plasma Renin Activity (PRA) (ng/mL/hr)                             | Median [IQR]<br>(min, max) | missing=71<br>0.6 (0.2, 1.4)<br>(0.2, 116.6)  | missing=266<br>0.5 (0.2, 1.1)<br>(0.2, 160)    | 0.0780  |
| Log-Aldosterone                                                    | Median [IQR]<br>(min, max) | missing=15<br>1.5 (1, 2.2)<br>(0.6, 3.7)      | missing=0<br>1.5 (1, 2)<br>(0.6, 4.1)          | 0.1038  |
| Log-Plasma Renin Activity                                          | Median [IQR]<br>(min, max) | missing=71<br>-0.5 (-1.6, 0.3)<br>(-1.7, 4.8) | missing=266<br>-0.7 (-1.6, 0.1)<br>(-1.7, 5.1) | 0.0780  |

| Variable                              | Level                       | Excluded (n=236)                          | Included (n=912)                             | p-value |
|---------------------------------------|-----------------------------|-------------------------------------------|----------------------------------------------|---------|
| Log-Aldosterone: Renin Ratio          | Median [IQR]<br>(min, max)  | missing=71<br>2 (1.2, 2.9)<br>(-2.4, 4.9) | missing=266<br>2.3 (1.4, 2.9)<br>(-3.2, 4.7) | 0.2771  |
| Gender                                | Female                      | 155 (66%)                                 | 629 (69%)                                    | 0.3328  |
|                                       | Male                        | 81 (34%)                                  | 283 (31%)                                    |         |
| Education                             | Missing                     | 9 (4%)                                    | 0 (0%)                                       | 0.0019  |
|                                       | < high school<br>education  | 62 (26%)                                  | 165 (18%)                                    |         |
|                                       | ≥ high school               | 165 (70%)                                 | 747 (82%)                                    |         |
| Occupation                            | Missing                     | 1 (0%)                                    | 0 (0%)                                       | 0.0229  |
|                                       | Management/P<br>rofessional | 82 (35%)                                  | 393 (43%)                                    |         |
|                                       | other                       | 153 (65%)                                 | 519 (57%)                                    |         |
| Smoking status                        | Missing                     | 9 (4%)                                    | 0 (0%)                                       | 0.0004  |
|                                       | No                          | 187 (79%)                                 | 826 (91%)                                    |         |
|                                       | Yes                         | 40 (17%)                                  | 86 (9%)                                      |         |
| Physical activity                     | Missing                     | 1 (0%)                                    | 0 (0%)                                       | 0.2169  |
|                                       | Poor Health                 | 120 (51%)                                 | 435 (48%)                                    |         |
|                                       | Intermediate<br>Health      | 78 (33%)                                  | 287 (31%)                                    |         |
|                                       | Ideal Health                | 37 (16%)                                  | 190 (21%)                                    |         |
| Alcohol use                           | Missing                     | 3 (1%)                                    | 0 (0%)                                       | 0.9962  |
|                                       | No                          | 130 (55%)                                 | 509 (56%)                                    |         |
|                                       | Yes                         | 103 (44%)                                 | 403 (44%)                                    |         |
| Diabetes                              | Missing                     | 10 (4%)                                   | 0 (0%)                                       | <.0001  |
|                                       | No                          | 130 (55%)                                 | 721 (79%)                                    |         |
|                                       | Yes                         | 96 (41%)                                  | 191 (21%)                                    |         |
| Cardiovascular disease history        | No                          | 189 (80%)                                 | 832 (91%)                                    |         |
|                                       | Yes                         | 47 (20%)                                  | 80 (9%)                                      |         |
| Use of Antihypertensive Medications   | Missing                     | 24 (10%)                                  | 0 (0%)                                       | 0.0056  |
|                                       | No                          | 68 (29%)                                  | 387 (42%)                                    |         |
|                                       | Yes                         | 144 (61%)                                 | 525 (58%)                                    |         |
| Use of Hormone Replacement<br>Therapy | Missing                     | 24 (10%)                                  | 0 (0%)                                       | 0.0125  |
|                                       | No                          | 182 (77%)                                 | 713 (78%)                                    |         |

| Variable                           | Level   | Excluded (n=236) | Included (n=912) | p-value |
|------------------------------------|---------|------------------|------------------|---------|
|                                    | Yes     | 30 (13%)         | 199 (22%)        |         |
| Clinic Hypertension                | Missing | 5 (2%)           | 0 (0%)           | 0.5685  |
|                                    | No      | 189 (80%)        | 731 (80%)        |         |
|                                    | Yes     | 42 (18%)         | 181 (20%)        |         |
| Daytime Hypertension               | Missing | 3 (1%)           | 0 (0%)           | 0.0803  |
|                                    | No      | 130 (55%)        | 566 (62%)        |         |
|                                    | Yes     | 103 (44%)        | 346 (38%)        |         |
| Nocturnal Hypertension             | Missing | 74 (31%)         | 0 (0%)           | 0.0254  |
|                                    | No      | 57 (24%)         | 407 (45%)        |         |
|                                    | Yes     | 105 (44%)        | 505 (55%)        |         |
| Daytime and Nocturnal Hypertension | Missing | 74 (31%)         | 0 (0%)           | 0.3239  |
|                                    | No      | 101 (43%)        | 605 (66%)        |         |
|                                    | Yes     | 61 (26%)         | 307 (34%)        |         |
| Sustained Hypertension             | Missing | 8 (3%)           | 0 (0%)           | 0.8649  |
|                                    | No      | 195 (83%)        | 784 (86%)        |         |
|                                    | Yes     | 33 (14%)         | 128 (14%)        |         |
| Non-Dipping Pattern                | Missing | 74 (31%)         | 0 (0%)           | 0.0496  |
|                                    | No      | 43 (18%)         | 314 (34%)        |         |
|                                    | Yes     | 119 (50%)        | 598 (66%)        |         |
| White Coat Hypertension            | Missing | 8 (3%)           | 0 (0%)           | 0.1670  |
|                                    | No      | 220 (93.2%)      | 859 (94%)        |         |
|                                    | Yes     | 8 (3%)           | 53 (6%)          |         |
| Masked Hypertension                | Missing | 8 (3%)           | 0 (0%)           | 0.0651  |
|                                    | No      | 160 (68%)        | 694 (76%)        |         |
|                                    | Yes     | 68(29%)          | 218 (24%)        |         |

**Supplemental Table I Legend:**

Values are mean +/- (SD) and (min, max) or % unless otherwise indicated.

P-values were calculated using chi-square (categorical variables), ANOVA (parametric continuous variables), and Kruskal-Wallis tests (non-parametric continuous variables).

CKD-EPI (Chronic Kidney Disease Epidemiology collaboration equation); AHA, American Heart Association, AHA physical activity was defined by AHA "2020" guidelines. Physical activity was considered as poor health (0 min of moderate and vigorous activity), intermediate health (> 0 min but < 150 min of moderate activity), >0 min but <75 min of vigorous activity, or > 0 min but < 150 min of combined moderate and vigorous activity), and ideal health ( $\geq$  150 min of moderate activity,  $\geq$  75 min of vigorous activity, or  $\geq$  150 min of combined moderate and vigorous activity).

Clinic Hypertension = clinic SBP  $\geq$ 140 mmHg or clinic DBP  $\geq$ 90 mmHg; Daytime Hypertension = daytime SBP  $\geq$  135 mmHg or daytime DBP  $\geq$ 85 mmHg, Nocturnal Hypertension = night-time SBP  $\geq$  120 mmHg or night-time DBP  $\geq$  70 mmHg; Daytime & Nocturnal hypertension = combination of Daytime and Nocturnal Hypertension; Sustained hypertension = combination of Clinic and Daytime Hypertension; Non-Dipping Pattern = <10% decrease in mean awake vs mean asleep SBP; White Coat Hypertension = absence of Daytime Hypertension with presence of Clinic Hypertension, Masked Hypertension = presence of Daytime Hypertension with absence of Clinic Hypertension.

Supplemental Table II: Ambulatory Blood Pressure Phenotype Definitions

| Ambulatory Blood Pressure Phenotype | Definition                                                      |
|-------------------------------------|-----------------------------------------------------------------|
| Clinic Hypertension                 | SBP $\geq$ 140 mmHg or DBP $\geq$ 90 mmHg                       |
| Daytime Hypertension                | SBP $\geq$ 135 mmHg or DBP $\geq$ 85 mmHg                       |
| Nocturnal Hypertension              | SBP $\geq$ 120 mmHg or DBP $\geq$ 70 mmHg                       |
| Non-dipping Pattern                 | Less than 10% reduction in mean awake to mean asleep SBP        |
| Daytime and Nocturnal Hypertension  | The combination of Daytime and Nocturnal Hypertension           |
| Sustained Hypertension              | The combination of Clinic Hypertension and Daytime Hypertension |
| White Coat Hypertension             | Clinic Hypertension without Daytime Hypertension                |
| Masked Hypertension                 | Daytime Hypertension without Clinic Hypertension                |

Supplemental Table II Legend:

Abbreviations: SBP = systolic blood pressure; DBP = diastolic blood pressure

Supplemental Table III: The Association of Log-Aldosterone, Log-Plasma Renin Activity and Log-Aldosterone: Renin Ratio with Clinic, Daytime, and Nighttime Systolic Blood Pressure, Diastolic Blood Pressure and Percent Dipping with Adjustment for Anti-Hypertensive Medications

|                 |         | Log-Aldosterone (n=912) |         | Log-PRA (n=646)      |         | Log-aldosterone:renin ratio (n=646) |         |
|-----------------|---------|-------------------------|---------|----------------------|---------|-------------------------------------|---------|
|                 |         | Beta (CI)               | p-value | Beta (CI)            | p-value | Beta (CI)                           | p-value |
| Clinic SBP      | Model 1 | 1 (-0.62, 2.61)         | 0.2273  | -3.1 (-4.1, -2.09)   | <.0001  | 2.66 (1.72, 3.61)                   | <.0001  |
|                 | Model 2 | 0.69 (-1.15, 2.53)      | 0.4606  | -3.15 (-4.17, -2.13) | <.0001  |                                     |         |
| Clinic DBP      | Model 1 | 0.96 (0.12, 1.81)       | 0.0255  | -1.1 (-1.64, -0.56)  | 0.0005  | 1.2 (0.7, 1.7)                      | <.0001  |
|                 | Model 2 | 1.22 (0.24, 2.2)        | 0.0146  | -1.19 (-1.73, -0.65) | <.0001  |                                     |         |
| Awake SBP       | Model 1 | 1.22 (-0.11, 2.54)      | 0.0712  | -2.88 (-3.71, -2.04) | <.0001  | 2.61 (1.83, 3.4)                    | <.0001  |
|                 | Model 2 | 1.17 (-0.36, 2.7)       | 0.1329  | -2.97(-3.81, -2.12)  | <.0001  |                                     |         |
| Awake DBP       | Model 1 | 1.02 (0.12, 1.93)       | 0.0262  | -1.66 (-2.23, -1.1)  | <.0001  | 1.61 (1.08, 2.13)                   | <.0001  |
|                 | Model 2 | 1.04 (0.01, 2.07)       | 0.0480  | -1.75 (-2.32, -1.18) | <.0001  |                                     |         |
| Asleep SBP      | Model 1 | 1.36 (-0.14, 2.87)      | 0.0760  | -3.34 (-4.3, -2.39)  | <.0001  | 2.95 (2.05, 3.84)                   | <.0001  |
|                 | Model 2 | 1.03 (-0.72, 2.77)      | 0.2475  | -3.42 (-4.39, -2.46) | <.0001  |                                     |         |
| Asleep DBP      | Model 1 | 1.35 (0.37, 2.33)       | 0.0072  | -1.53 (-2.15, -0.9)  | <.0001  | 1.5 (0.92, 2.08)                    | <.0001  |
|                 | Model 2 | 1.05 (-0.09, 2.19)      | 0.0717  | -1.61(-2.24, -0.98)  | <.0001  |                                     |         |
| Percent dipping | Model 1 | -0.22 (-1.02, 0.59)     | 0.5964  | 0.46 (-0.07, 1)      | 0.0902  | -0.36 (-0.86, 0.14)                 | 0.1588  |
|                 | Model 2 | 0.046 (-0.94, 1.03)     | 0.9261  | 0.46 (-0.08, 1.07)   | 0.0963  |                                     |         |

Supplemental Table III Legend:

Model 1: age, sex, education and occupation, smoking, waist circumference, physical activity, low-density lipoprotein, history of cardiovascular disease, alcohol intake, diabetes, hormone replacement therapy, estimated glomerular filtration rate and antihypertensive medication status

Model 2: Model 1 + log-PRA or log-aldosterone (mutually adjusted model)

Abbreviations: SBP = systolic blood pressure, DBP = diastolic blood pressure, PRA = plasma renin activity, CI = confidence interval

Interpretation Example:

*Clinic SBP - A 100% higher aldosterone was associated with a 0.69 mmHg higher clinic SBP. A 100% higher PRA was associated with a 2.15 mmHg lower clinic SBP. A 100% higher aldosterone:renin ratio was associated with a 1.84 mmHg higher clinic SBP (Model 1, Formula:  $\beta \cdot \ln(2)$ )*

Supplemental Table IV: The Association of Log-Aldosterone, Log-Plasma Renin Activity and Log-Aldosterone: Renin Ratio with Ambulatory Blood Pressure Phenotypes with Adjustment for Anti-Hypertensive Medications

|                                    |         | Log-Aldosterone (n=912) |         | Log-PRA (n=646)   |         | Log-Aldosterone:renin ratio (n=646) |         |
|------------------------------------|---------|-------------------------|---------|-------------------|---------|-------------------------------------|---------|
|                                    |         | OR (CI)                 | p-value | OR (CI)           | p-value | OR (CI)                             | p-value |
| Clinic Hypertension                | Model 1 | 1.19 (0.91, 1.55)       | 0.1997  | 0.63 (0.51, 0.79) | <.0001  | 1.47 (1.22, 1.79)                   | <.0001  |
|                                    | Model 2 | 1.19 (0.85, 1.66)       | 0.3086  | 0.62 (0.5, 0.78)  | <.0001  |                                     |         |
| Daytime Hypertension               | Model 1 | 1.14 (0.91, 1.44)       | 0.2434  | 0.58 (0.49, 0.7)  | <.0001  | 1.57 (1.34, 1.84)                   | <.0001  |
|                                    | Model 2 | 1.17 (0.88, 1.55)       | 0.2844  | 0.58 (0.48, 0.69) | <.0001  |                                     |         |
| Nocturnal Hypertension             | Model 1 | 1.35 (1.08, 1.7)        | 0.0090  | 0.69 (0.59, 0.8)  | <.0001  | 1.46 (1.26, 1.69)                   | <.0001  |
|                                    | Model 2 | 1.35 (1.02, 1.79)       | 0.0359  | 0.67 (0.57, 0.79) | <.0001  |                                     |         |
| Daytime and Nocturnal Hypertension | Model 1 | 1.22 (0.97, 1.54)       | 0.0972  | 0.59 (0.49, 0.71) | <.0001  | 1.57 (1.33, 1.85)                   | <.0001  |
|                                    | Model 2 | 1.2 (0.9, 1.61)         | 0.2221  | 0.58 (0.48, 0.7)  | <.0001  |                                     |         |
| Sustained Hypertension             | Model 1 | 1.29 (0.95, 1.75)       | 0.0977  | 0.52 (0.39, 0.7)  | <.0001  | 1.69 (1.33, 2.14)                   | <.0001  |
|                                    | Model 2 | 1.23 (0.84, 1.81)       | 0.2911  | 0.51 (0.38, 0.68) | <.0001  |                                     |         |
| Non-Dipping Blood Pressure Pattern | Model 1 | 0.99 (0.79, 1.25)       | 0.9474  | 0.96 (0.83, 1.12) | 0.6326  | 1.004 (0.87, 1.16)                  | 0.9566  |
|                                    | Model 2 | 0.91 (0.69, 1.2)        | 0.4850  | 0.97 (0.83, 1.13) | 0.7119  |                                     |         |
| White Coat Hypertension            | Model 1 | 0.94 (0.6, 1.48)        | 0.7947  | 0.95 (0.7, 1.3)   | 0.7492  | 1.06 (0.79, 1.41)                   | 0.7077  |
|                                    | Model 2 | 1.06 (0.61, 1.85)       | 0.8439  | 0.95 (0.69, 1.3)  | 0.7318  |                                     |         |
| Masked Hypertension                | Model 1 | 1 (0.77, 1.28)          | 0.9819  | 0.74 (0.61, 0.89) | 0.0015  | 1.28 (1.08, 1.51)                   | 0.0036  |
|                                    | Model 2 | 1.06 (0.78, 1.44)       | 0.7256  | 0.74 (0.61, 0.89) | 0.0015  |                                     |         |

Supplemental Table IV Legend:

Model 1: age, sex, education and occupation, smoking, waist circumference, physical activity, low-density lipoprotein, history of cardiovascular disease, alcohol intake, diabetes, hormone replacement therapy, estimated glomerular filtration rate and antihypertensive medication status

Model 2: Model 1 + log-PRA or log-aldosterone (mutually adjusted model)

Abbreviations: PRA = plasma renin activity; OR = odds ratio; CI = confidence interval

Interpretation Example:

*Nocturnal hypertension - A 1-unit increase in log-aldosterone was associated with 35% higher odds of nocturnal hypertension (Model 1)*



Supplemental Table V. The Association of Log-Aldosterone, Log-Plasma Renin Activity and Log-Aldosterone: Renin Ratio with Clinic, Daytime, and Nighttime Systolic Blood Pressure, Diastolic Blood Pressure and Percent Dipping

|                 |         | Log-Aldosterone (n=912) |         | Log-PRA (n=646)      |         | Log-Aldosterone:renin ratio (n=646) |         |
|-----------------|---------|-------------------------|---------|----------------------|---------|-------------------------------------|---------|
|                 |         | Beta (CI)               | p-value | Beta (CI)            | p-value | Beta (CI)                           | p-value |
| Clinic SBP      | Model 1 | 1.53 (-0.03, 3.09)      | 0.0542  | -2.74 (-3.73, -1.76) | <.0001  | 2.59 (1.64, 3.53)                   | <.0001  |
|                 | Model 2 | 1.28 (-0.52, 3.08)      | 0.1628  | -2.88 (-3.89, -1.88) | <.0001  |                                     |         |
| Clinic DBP      | Model 1 | 1.22 (0.41, 2.04)       | 0.0032  | -0.9 (-1.47, -0.42)  | 0.0005  | 1.16 (0.66, 1.66)                   | <.0001  |
|                 | Model 2 | 1.43 (0.48, 2.39)       | 0.0033  | -1.1 (-1.63, -0.57)  | <.0001  |                                     |         |
| Awake SBP       | Model 1 | 1.37 (0.1, 2.64)        | 0.0342  | -2.72 (-3.54, -1.91) | <.0001  | 2.6 (1.82, 3.38)                    | <.0001  |
|                 | Model 2 | 1.38 (-0.1, 2.87)       | 0.0684  | -2.87 (-3.7, -2.04)  | <.0001  |                                     |         |
| Awake DBP       | Model 1 | 1.24 (0.38, 2.11)       | 0.0050  | -1.47 (-2.03, -0.92) | <.0001  | 1.56 (1.04, 2.09)                   | <.0001  |
|                 | Model 2 | 1.33 (0.32, 2.33)       | 0.0099  | -1.62 (-2.18, -1.06) | <.0001  |                                     |         |
| Asleep SBP      | Model 1 | 1.67 (0.22, 3.12)       | 0.0240  | -3.09 (-4.02, -2.16) | <.0001  | 2.91 (2.02, 3.8)                    | <.0001  |
|                 | Model 2 | 1.42 (-0.28, 3.12)      | 0.1017  | -3.25 (-4.2, -2.3)   | <.0001  |                                     |         |
| Asleep DBP      | Model 1 | 1.54 (0.6, 2.48)        | 0.0014  | -1.34 (-1.95, -0.73) | <.0001  | 1.46 (0.87, 2.04)                   | <.0001  |
|                 | Model 2 | 1.32 (0.21, 2.43)       | 0.0198  | -1.49 (-2.11, -0.87) | <.0001  |                                     |         |
| Percent dipping | Model 1 | -0.35 (-1.12, 0.42)     | 0.3787  | 0.38 (-0.14, 0.9)    | 0.1561  | -0.34 (-0.84, 0.16)                 | 0.1845  |
|                 | Model 2 | -0.11 (-1.06, 0.84)     | 0.8208  | 0.39 (-0.14, 0.92)   | 0.1515  |                                     |         |

Supplemental Table V Legend:

Model 1 includes age, sex, education and occupation, smoking, waist circumference, physical activity, low-density lipoprotein, history of cardiovascular disease, alcohol intake, diabetes, hormone replacement therapy and estimated glomerular filtration rate

Model 2 includes Model 1 + PRA or aldosterone (mutually adjusted model)

Legend: SBP: systolic blood pressure; DBP: diastolic blood pressure; PRA = plasma renin activity

Interpretation Example:

*Clinic SBP - A 100% increase in aldosterone was associated with a 1.06 mmHg higher clinic SBP, a 100% increase in PRA was associated with a 1.90 mmHg lower clinic SBP, and a 100% increase in the aldosterone to renin ratio was associated with a 0.78 mmHg higher clinic SBP (Model 1, Formula:  $\beta \cdot \ln(2)$ )*

$\alpha = 0.0036$  (0.05/14 to adjust for testing 7 outcomes with 2 predictors using Bonferroni correction)

Supplemental Table VI. The Association of Log-Aldosterone, Log-Plasma Renin Activity and Log-Aldosterone: Renin Ratio with Ambulatory Blood Pressure Phenotypes

|                                    |         | Log-Aldosterone<br>(n=912) |         | Log-Plasma Renin Activity<br>(n=646) |         | Log-Aldosterone:renin ratio<br>(n=646) |         |
|------------------------------------|---------|----------------------------|---------|--------------------------------------|---------|----------------------------------------|---------|
|                                    |         | OR (CI)                    | p-value | OR (CI)                              | p-value | OR (CI)                                | p-value |
| Clinic hypertension                | Model 1 | 1.25 (0.97, 1.61)          | 0.0904  | 0.65 (0.52, 0.82)                    | 0.0002  | 1.47 (1.21, 1.79)                      | 0.0001  |
|                                    | Model 2 | 1.25 (0.91, 1.74)          | 0.1722  | 0.64 (0.51, 0.8)                     | <.0001  |                                        |         |
| Daytime hypertension               | Model 1 | 1.19 (0.96, 1.48)          | 0.1217  | 0.6 (0.51, 0.72)                     | <.0001  | 1.57 (1.34, 1.84)                      | <.0001  |
|                                    | Model 2 | 1.23 (0.94, 1.63)          | 0.1335  | 0.59 (0.49, 0.71)                    | <.0001  |                                        |         |
| Nocturnal hypertension             | Model 1 | 1.37 (1.1, 1.7)            | 0.0048  | 0.7 (0.6, 0.82)                      | <.0001  | 1.46 (1.26, 1.69)                      | <.0001  |
|                                    | Model 2 | 1.38 (1.05, 1.81)          | 0.0208  | 0.68 (0.58, 0.79)                    | <.0001  |                                        |         |
| Daytime and Nocturnal Hypertension | Model 1 | 1.24 (0.99, 1.55)          | 0.0639  | 0.6 (0.5, 0.72)                      | <.0001  | 1.57 (1.33, 1.85)                      | <.0001  |
|                                    | Model 2 | 1.23 (0.93, 1.64)          | 0.1501  | 0.59 (0.48, 0.71)                    | <.0001  |                                        |         |
| Sustained hypertension             | Model 1 | 1.33 (0.99, 1.78)          | 0.0575  | 0.54 (0.41, 0.72)                    | <.0001  | 1.69 (1.33, 2.14)                      | <.0001  |
|                                    | Model 2 | 1.3 (0.89, 1.89)           | 0.1795  | 0.52 (0.39, 0.7)                     | <.0001  |                                        |         |
| Non-dipping blood pressure pattern | Model 1 | 1.01(0.81, 1.26)           | 0.9538  | 0.96 (0.83, 1.11)                    | 0.6033  | 1.005 (0.87, 1.16)                     | 0.9423  |
|                                    | Model 2 | 0.91 (0.69, 1.19)          | 0.4807  | 0.97 (0.84, 1.13)                    | 0.7150  |                                        |         |
| White coat hypertension            | Model 1 | 1.02 (0.66, 1.58)          | 0.9205  | 0.97 (0.72, 1.32)                    | 0.8640  | 1.05 (0.78, 1.41)                      | 0.7361  |
|                                    | Model 2 | 1.11 (0.64, 1.9)           | 0.7158  | 0.96 (0.7, 1.32)                     | 0.8143  |                                        |         |
| Masked hypertension                | Model 1 | 1.03 (0.8, 1.31)           | 0.8332  | 0.76 (0.63, 0.91)                    | 0.0026  | 1.28 (1.08, 1.51)                      | 0.0039  |
|                                    | Model 2 | 1.1 (0.81, 1.48)           | 0.5452  | 0.75 (0.62, 0.9)                     | 0.0022  |                                        |         |

Supplemental Table VI Legend:

Model 1: age, sex, education and occupation, smoking, waist circumference, physical activity, low-density lipoprotein, history of cardiovascular disease, alcohol intake, diabetes, hormone replacement therapy and estimated glomerular filtration rate

Model 2: Model 1 + PRA or aldosterone (mutually adjusted model).

Abbreviations: OR = odds ratio; CI = confidence interval

Clinic Hypertension = clinic SBP  $\geq$ 140 mmHg or clinic DBP  $\geq$ 90 mmHg; Daytime Hypertension = daytime SBP  $\geq$  135 mmHg or daytime DBP  $\geq$ 85 mmHg, Nocturnal Hypertension = night-time SBP  $\geq$  120 mmHg or night-time DBP  $\geq$  70 mmHg; Daytime & Nocturnal hypertension = combination of Daytime and Nocturnal Hypertension; Sustained hypertension = combination of Clinic and Daytime Hypertension; Non-Dipping Pattern = <10% decrease in mean awake vs mean asleep SBP; White Coat Hypertension = absence of Daytime Hypertension with presence of Clinic Hypertension, Masked Hypertension = presence of Daytime Hypertension with absence of Clinic Hypertension.

Interpretation Example:

*Clinic Hypertension: a 1-unit higher log-aldosterone was associated with 25% higher odds of clinic hypertension (p=0.09); a 1-unit increase in log-plasma renin activity was associated with 35% lower odds of clinic hypertension (p=0.0002); and a 1-unit higher log aldosterone:renin ratio was associated with 47% higher odds of clinic hypertension (p=0.0001) (Model 1).*

$\alpha$  = 0.0031 (0.05/16 to adjust for testing 8 outcomes with 2 predictors using Bonferroni correction)

Supplemental Table VII: Association of Aldosterone, PRA and Aldosterone: Renin Ratio with Ambulatory Blood Pressure Phenotypes Based on Hypertension Definition of SBP  $\geq$ 130 or DBP  $\geq$  80 mmHg

|                                    |         | Log-Aldosterone<br>(n=912) |         | Log-PRA<br>(n=646) |         | Log-Aldosterone:renin ratio<br>(n=646) |         |
|------------------------------------|---------|----------------------------|---------|--------------------|---------|----------------------------------------|---------|
|                                    |         | OR (CI)                    | p-value | OR (CI)            | p-value | OR (CI)                                | p-value |
| Clinic hypertension                | Model 1 | 1.13 (0.92, 1.39)          | 0.2566  | 0.81 (0.70, 0.93)  | 0.0032  | 1.23 (1.07, 1.41)                      | 0.0031  |
|                                    | Model 2 | 1.12 (0.87, 1.44)          | 0.3921  | 0.8 (0.69, 0.92)   | 0.0023  |                                        |         |
| Daytime hypertension               | Model 1 | 1.24 (1.01, 1.54)          | 0.0447  | 0.69 (0.6, 0.81)   | <.0001  | 1.42 (1.23, 1.64)                      | <.0001  |
|                                    | Model 2 | 1.21 (0.93, 1.58)          | 0.1511  | 0.68 (0.58, 0.79)  | <.0001  |                                        |         |
| Nocturnal hypertension             | Model 1 | 1.22 (0.93, 1.59)          | 0.1574  | 0.71 (0.60, 0.83)  | <.0001  | 1.39 (1.18, 1.63)                      | <.0001  |
|                                    | Model 2 | 1.12 (0.81, 1.56)          | 0.4837  | 0.7 (0.59, 0.83)   | <.0001  |                                        |         |
| Daytime and Nocturnal Hypertension | Model 1 | 1.3 (1.05, 1.61)           | 0.0164  | 0.66 (0.57, 0.78)  | <.0001  | 1.47 (1.27, 1.7)                       | <.0001  |
|                                    | Model 2 | 1.23 (0.94, 1.6)           | 0.1284  | 0.65 (0.55, 0.76)  | <.0001  |                                        |         |
| Sustained hypertension             | Model 1 | 1.21 (0.98, 1.51)          | 0.0806  | 0.67 (0.57, 0.8)   | <.0001  | 1.42 (1.22, 1.66)                      | <.0001  |
|                                    | Model 2 | 1.16 (0.89, 1.52)          | 0.2788  | 0.66 (0.55, 0.79)  | <.0001  |                                        |         |
| White coat hypertension            | Model 1 | 0.88 (0.64, 1.2)           | 0.4085  | 1.22 (1.01, 1.47)  | 0.0377  | 0.84 (0.70, 1.00)                      | 0.0555  |
|                                    | Model 2 | 0.95 (0.66, 1.37)          | 0.7925  | 1.23 (1.01, 1.48)  | 0.0366  |                                        |         |
| Masked hypertension                | Model 1 | 1.05 (0.81, 1.36)          | 0.7043  | 0.95 (0.80, 1.13)  | 0.5894  | 1.06 (0.90, 1.25)                      | 0.4820  |
|                                    | Model 2 | 1.08 (0.79, 1.47)          | 0.6399  | 0.95 (0.79, 1.13)  | 0.5381  |                                        |         |

Supplemental Table VII Legend:

Model 1: age, sex, education and occupation, smoking, waist circumference, physical activity, low-density lipoprotein, history of cardiovascular disease, alcohol intake, diabetes, hormone replacement therapy and estimated glomerular filtration rate

Model 2: Model 1 + PRA or aldosterone (mutually adjusted model).

Abbreviations: SBP: Systolic blood pressure; DBP: Diastolic blood pressure; PRA: plasma renin activity:

Clinic Hypertension = clinic SBP  $\geq$ 140 mmHg or clinic DBP  $\geq$ 90 mmHg; Daytime Hypertension = daytime SBP  $\geq$  135 mmHg or daytime DBP  $\geq$ 85 mmHg, Nocturnal Hypertension = night-time SBP  $\geq$  120 mmHg or night-time DBP  $\geq$  70 mmHg; Daytime & Nocturnal hypertension = combination of Daytime and Nocturnal Hypertension; Sustained hypertension = combination of Clinic and Daytime Hypertension; Non-Dipping Pattern = <10% decrease in mean awake vs mean asleep SBP; White Coat Hypertension = absence of Daytime Hypertension with presence of Clinic Hypertension, Masked Hypertension = presence of Daytime Hypertension with absence of Clinic Hypertension.

Interpretation Example:

*Daytime Hypertension - a 1-unit higher log-aldosterone was associated with 24% higher odds of daytime hypertension (p=0.0447); a 1-unit higher log-PRA was associated with 31% lower odds of daytime hypertension (p<.0001); a 1-unit higher log-aldosterone: renin ratio was associated with 42% higher odds of daytime hypertension (p<.0001) (Model 1).*

Supplemental Table VIII. The Association of Plasma Renin Activity Phenotype with Clinic, Daytime, and Nighttime Systolic Blood Pressure, Diastolic Blood Pressure and Percent Dipping

|            |         | Suppressed PRA Phenotype<br>(N=348)<br>(PRA ≤0.50 ng/mL/h) | Indeterminate PRA Phenotype<br>(N=113)<br>(PRA, 0.51 to 0.99 ng/mL/h) | Unsuppressed PRA<br>Phenotype (N=185)<br>(PRA ≥1.0 ng/mL/h) |
|------------|---------|------------------------------------------------------------|-----------------------------------------------------------------------|-------------------------------------------------------------|
|            |         | Beta (CI), P-value                                         | Beta (CI), P-value                                                    | Beta (CI), P-value                                          |
| clinic SBP | Model 1 | 5.77 (3.07, 8.48), <.0001                                  | 1.41 (-2.07, 4.89), 0.4274                                            | Ref                                                         |
|            | Model 2 | 6.03 (3.28, 8.77), <.0001                                  | 1.5 (-1.98, 4.98), 0.3978                                             | Ref                                                         |
| clinic DBP | Model 1 | 2.11 (0.68, 3.54), 0.0040                                  | 0.41 (-1.44, 2.25), 0.6636                                            | Ref                                                         |
|            | Model 2 | 2.45 (1, 3.9), 0.0009                                      | 0.54 (-1.3, 2.37), 0.5667                                             | Ref                                                         |
| Awake SBP  | Model 1 | 5.67 (3.42, 7.92), <.0001                                  | 3.25 (0.35, 6.14), 0.0280                                             | Ref                                                         |
|            | Model 2 | 5.93 (3.65, 8.21), <.0001                                  | 3.35 (0.5, 6.24), 0.0236                                              | Ref                                                         |
| Awake DBP  | Model 1 | 2.76 (1.24, 4.28), 0.0004                                  | 2.79 (0.83, 4.75), 0.0054                                             | Ref                                                         |
|            | Model 2 | 3.03 (1.49, 4.57), 0.0001                                  | 2.89 (0.93, 4.85), 0.0039                                             | Ref                                                         |
| Asleep SBP | Model 1 | 7.24 (4.69, 9.80), <.0001                                  | 2.60 (-0.68, 5.89), 0.1203                                            | Ref                                                         |
|            | Model 2 | 7.54 (4.95, 10.13), <.0001                                 | 2.71 (-0.57, 6), 0.1056                                               | Ref                                                         |
| Asleep DBP | Model 1 | 2.94 (1.27, 4.62), 0.0006                                  | 1.38 (-0.77, 3.53), 0.2077                                            | Ref                                                         |
|            | Model 2 | 3.24 (1.55, 4.93), 0.0002                                  | 1.49 (-0.65, 3.64), 0.1728                                            | Ref                                                         |
| % dipping  | Model 1 | -1.4 (-2.81, 0.02), 0.0535                                 | 0.33 (-1.49, 2.16), 0.7187                                            | Ref                                                         |
|            | Model 2 | -1.44 (-2.87, 0.001), 0.0502                               | 0.32 (-1.51, 2.15), 0.7316                                            | Ref                                                         |

Supplemental Table VIII Legend:

Model 1: age, sex, education and occupation, smoking, waist circumference, physical activity, low-density lipoprotein, history of cardiovascular disease, alcohol, diabetes, hormone replacement therapy and estimated glomerular filtration rate

Model 2: Model 1 + aldosterone

Abbreviations: SBP = systolic blood pressure; DBP = diastolic blood pressure; PRA = plasma renin activity; CI = confidence interval

Interpretation Example:

*Clinic SBP – Those with the Suppressed PRA phenotype had a 5.77 mmHg higher SBP compared to the unsuppressed renin phenotype (Model 1).*

$\alpha = 0.0071$  (0.05/7 to adjust for testing 7 outcomes using Bonferroni correction)

Supplemental Table IX. The Association of Plasma Renin Activity Phenotype with Ambulatory Blood Pressure Phenotypes

|                                       |         | Suppressed PRA Phenotype<br>(N=348)<br>(PRA ≤0.50 ng/mL/h) | Indeterminate PRA<br>Phenotype (N=113)<br>(PRA, 0.51 to 0.99 ng/mL/h) | Unsuppressed PRA<br>Phenotype (N=185)<br>(PRA ≥1.0 ng/mL/h) |
|---------------------------------------|---------|------------------------------------------------------------|-----------------------------------------------------------------------|-------------------------------------------------------------|
|                                       |         | OR (CI), p-value                                           | OR (CI), p-value                                                      | OR (CI)                                                     |
| Clinic Hypertension                   | Model 1 | 2.75 (1.59, 4.77), 0.0003                                  | 1.56 (0.78, 3.13), 0.2079                                             | Ref                                                         |
|                                       | Model 2 | 2.89 (1.66, 5.05), 0.0002                                  | 1.6 (0.8, 3.21), 0.1861                                               | Ref                                                         |
| Daytime Hypertension                  | Model 1 | 2.90 (1.88, 4.47), <.0001                                  | 1.70 (0.99, 2.92), 0.0535                                             | Ref                                                         |
|                                       | Model 2 | 3.01 (1.94, 4.67), <.0001                                  | 1.73 (1.01, 2.97), 0.0471                                             | Ref                                                         |
| Nocturnal Hypertension                | Model 1 | 2.14 (1.43, 3.19), 0.0002                                  | 1.14 (0.69, 1.90), 0.6105                                             | Ref                                                         |
|                                       | Model 2 | 2.3 (1.53, 3.45), <.0001                                   | 1.16 (0.7, 1.94), 0.5625                                              | Ref                                                         |
| Daytime and Nocturnal<br>Hypertension | Model 1 | 2.82 (1.79, 4.44), <.0001                                  | 1.44 (0.81, 2.55), 0.2102                                             | Ref                                                         |
|                                       | Model 2 | 2.93 (1.85, 4.62), <.0001                                  | 1.46 (0.83, 2.58), 0.1939                                             | Ref                                                         |
| Sustained Hypertension                | Model 1 | 4.32 (2.14, 8.71), <.0001                                  | 2.3 (0.98, 5.38), 0.0563                                              | Ref                                                         |
|                                       | Model 2 | 4.59 (2.25, 8.37), <.0001                                  | 2.39 (1.01, 5.64), 0.0465                                             | Ref                                                         |
| Non-Dipping Blood Pressure<br>Pattern | Model 1 | 1.29 (0.87, 1.93), 0.2066                                  | 0.78 (0.47, 1.29), 0.3384                                             | Ref                                                         |
|                                       | Model 2 | 1.27 (0.85, 1.91), 0.2480                                  | 0.78 (0.47, 1.29), 0.3265                                             | Ref                                                         |
| White Coat Hypertension               | Model 1 | 1.04 (0.46, 2.35), 0.9348                                  | 0.79 (0.26, 2.45), 0.6867                                             | Ref                                                         |
|                                       | Model 2 | 1.06 (0.46, 2.43), 0.8947                                  | 0.79 (0.26, 2.46), 0.6888                                             | Ref                                                         |
| Masked Hypertension                   | Model 1 | 1.64 (1.03, 2.6), 0.0362                                   | 1.3 (0.73, 2.32), 0.3796                                              | Ref                                                         |
|                                       | Model 2 | 1.66 (1.04, 2.64), 0.0338                                  | 1.31 (0.73, 2.34), 0.3701                                             | Ref                                                         |

**Supplemental Table IX Legend:**

Model 1: age, sex, education and occupation, smoking, waist circumference, physical activity, low-density lipoprotein, history of cardiovascular disease, alcohol, diabetes, hormone replacement therapy and estimated glomerular filtration rate

Model 2: Model 1 + aldosterone

Abbreviations: SBP: Systolic blood pressure; DBP: Diastolic blood pressure; PRA: plasma renin activity; CI = confidence interval; OR = odds ratio

Clinic Hypertension = clinic SBP ≥140 mmHg or clinic DBP ≥90 mmHg; Daytime Hypertension = daytime SBP ≥ 135 mmHg or daytime DBP ≥85 mmHg, Nocturnal Hypertension = night-time SBP ≥ 120 mmHg or night-time DBP ≥ 70 mmHg; Daytime & Nocturnal hypertension = combination of Daytime and Nocturnal Hypertension; Sustained hypertension = combination of Clinic and Daytime Hypertension; Non-Dipping Pattern = <10% decrease in mean awake vs mean asleep SBP; White Coat Hypertension = absence of Daytime Hypertension with presence of Clinic Hypertension, Masked Hypertension = presence of Daytime Hypertension with absence of Clinic Hypertension.

**Interpretation Example:**

*Clinic Hypertension – those with the Suppressed PRA phenotype had 175% higher odds of having clinic hypertension compared to those with the unsuppressed renin phenotype (Model 1).*

α= 0.0063 (0.05/8 to adjust for testing 8 outcomes using Bonferroni correction)

Supplemental Table X. The Association of Aldosterone Clinic, Daytime, and Nighttime Systolic Blood Pressure, Diastolic Blood Pressure and Percent Dipping Stratified by Plasma Renin Activity

| Exposure: Aldosterone   |                                                  |                     |
|-------------------------|--------------------------------------------------|---------------------|
| Plasma Renin Activity   | Clinic Systolic Blood Pressure<br>Beta (95% CI)  |                     |
|                         | Model 0                                          | Model 1             |
| ≥ 1.0 ng/mL/hour        | 1.52 (-1.43, 4.47)                               | 1.55 (-1.34, 4.44)  |
| 0.51 - 0.99 ng/mL/hour  | -5.49 (-9.97, -1)                                | -5.19 (-9.58, -0.8) |
| ≤ 0.50 ng/mL/hour       | 4.07 (1.44, 6.7)                                 | 2.66 (0.06, 5.26)   |
| p-value for interaction | 0.0016                                           | 0.0091              |
|                         | Clinic Diastolic Blood Pressure<br>Beta (95% CI) |                     |
|                         | Model 0                                          | Model 1             |
| ≥ 1.0 ng/mL/hour        | 1.42 (-0.13, 2.96)                               | 1.17 (-0.36, 2.71)  |
| 0.51 - 0.99 ng/mL/hour  | 1.11 (-1.24, 3.45)                               | 0.9 (-1.43, 3.24)   |
| ≤ 0.50 ng/mL/hour       | 1.38 (-0.001, 2.75)                              | 1.63 (0.25, 3.01)   |
| p-value for interaction | 0.9749                                           | 0.8392              |
|                         | Awake Systolic Blood Pressure<br>Beta (95% CI)   |                     |
|                         | Model 0                                          | Model 1             |
| ≥ 1.0 ng/mL/hour        | 0.45 (-2.13, 3.03)                               | 1.09 (-1.33, 3.5)   |
| 0.51 - 0.99 ng/mL/hour  | -3.83 (-7.75, 0.09)                              | -2.65 (-6.31, 1.01) |
| ≤ 0.50 ng/mL/hour       | 3.05 (0.75, 5.36)                                | 2.27 (0.09, 4.44)   |
| p-value for interaction | 0.0109                                           | 0.0751              |
|                         | Awake Diastolic Blood Pressure<br>Beta (95% CI)  |                     |
|                         | Model 0                                          | Model 1             |
| ≥ 1.0 ng/mL/hour        | -0.16 (-1.9, 1.59)                               | 0.31 (-1.32, 1.95)  |
| 0.51 - 0.99 ng/mL/hour  | 0.5 (-2.15, 3.14)                                | 1.12 (-1.36, 3.6)   |
| ≤ 0.50 ng/mL/hour       | 1.23 (-0.33, 2.78)                               | 1.66 (0.19, 3.13)   |
| p-value for interaction | 0.5073                                           | 0.4767              |
|                         | Asleep Systolic Blood Pressure<br>Beta (95% CI)  |                     |
|                         | Model 0                                          | Model 1             |
| ≥ 1.0 ng/mL/hour        | 1.28 (-1.67, 4.22)                               | 1.61 (-1.14, 4.35)  |
| 0.51 - 0.99 ng/mL/hour  | -0.93 (-5.41, 3.55)                              | -0.1 (-4.27, 4.07)  |
| ≤ 0.50 ng/mL/hour       | 2.57 (-0.06, 5.2)                                | 1.24 (-1.24, 3.71)  |
| p-value for interaction | 0.4075                                           | 0.7932              |
|                         | Asleep Diastolic Blood Pressure<br>Beta (95% CI) |                     |
|                         | Model 0                                          | Model 1             |
| ≥ 1.0 ng/mL/hour        | 0.39 (-1.45, 2.23)                               | 0.75 (-1.04, 2.55)  |
| 0.51 - 0.99 ng/mL/hour  | 1.17 (-1.63, 3.97)                               | 1.73 (-1, 4.45)     |
| ≤ 0.50 ng/mL/hour       | 1.37 (-0.27, 3.01)                               | 1.32 (-0.3, 2.93)   |
| p-value for interaction | 0.7288                                           | 0.8140              |
|                         | Percent dipping<br>Beta (95% CI)                 |                     |
|                         | Model 0                                          | Model 1             |
| ≥ 1.0 ng/mL/hour        | -0.69 (-2.21, 0.83)                              | -0.5 (-2.02, 1.03)  |
| 0.51 - 0.99 ng/mL/hour  | -1.91 (-4.22, 0.4)                               | -1.75 (-4.06, 0.56) |
| ≤ 0.50 ng/mL/hour       | 0.19 (-1.17, 1.55)                               | 0.65 (-0.72, 2.02)  |
| p-value for interaction | 0.2888                                           | 0.1839              |

Supplemental Table X Legend:

Model 0: Unadjusted

Model 1: age, sex, education and occupation, smoking, waist circumference, physical activity, low-density lipoprotein, history of cardiovascular disease, alcohol, diabetes, hormone replacement therapy and estimated glomerular filtration rate

Abbreviations: CI = confidence interval

Interpretation Example:

*Clinic SBP - Among those with a renin activity of  $\leq 0.50$  mg/mL/hr, a 100% increase in aldosterone was associated with a 1.84 mmHg higher SBP (Model 1, Formula:  $\beta \cdot \ln(2)$ ).*

Supplemental Table XI. The Association of Aldosterone with Ambulatory Blood Pressure Phenotypes Stratified by Plasma Renin Activity

| Exposure: Aldosterone                                     |                                            |                   |
|-----------------------------------------------------------|--------------------------------------------|-------------------|
| Plasma Renin Activity                                     | Clinic Hypertension<br>Odds Ratio (95% CI) |                   |
|                                                           | Model 0                                    | Model 1           |
| ≥ 1.0 ng/mL/hour                                          | 1.1 (0.61, 2)                              | 1.09 (0.6, 2)     |
| 0.51 - 0.99 ng/mL/hour                                    | 0.68 (0.3, 1.55)                           | 0.73 (0.31, 1.69) |
| ≤ 0.50 ng/mL/hour                                         | 1.71 (1.14, 2.56)                          | 1.49 (0.97, 2.29) |
| p-value for interaction                                   | 0.1100                                     | 0.2937            |
| Daytime Hypertension<br>Odds Ratio (95% CI)               |                                            |                   |
|                                                           | Model 0                                    | Model 1           |
| ≥ 1.0 ng/mL/hour                                          | 1.03 (0.67, 1.61)                          | 1.11 (0.7, 1.76)  |
| 0.51 - 0.99 ng/mL/hour                                    | 0.83 (0.45, 1.54)                          | 1.02 (0.53, 1.97) |
| ≤ 0.50 ng/mL/hour                                         | 1.39 (0.98, 1.97)                          | 1.29 (0.88, 1.89) |
| p-value for interaction                                   | 0.3035                                     | 0.7857            |
| Nocturnal Hypertension<br>Odds Ratio (95% CI)             |                                            |                   |
|                                                           | Model 0                                    | Model 1           |
| ≥ 1.0 ng/mL/hour                                          | 1.12 (0.76, 1.65)                          | 1.25 (0.82, 1.91) |
| 0.51 - 0.99 ng/mL/hour                                    | 1.01 (0.56, 1.83)                          | 1.18 (0.63, 2.24) |
| ≤ 0.50 ng/mL/hour                                         | 1.53 (1.06, 2.2)                           | 1.46 (0.98, 2.17) |
| p-value for interaction                                   | 0.3764                                     | 0.8118            |
| Daytime and Nocturnal Hypertension<br>Odds Ratio (95% CI) |                                            |                   |
|                                                           | Model 0                                    | Model 1           |
| ≥ 1.0 ng/mL/hour                                          | 1.02 (0.65, 1.62)                          | 1.13 (0.69, 1.84) |
| 0.51 - 0.99 ng/mL/hour                                    | 1.05 (0.55, 1.99)                          | 1.34 (0.67, 2.67) |
| ≤ 0.50 ng/mL/hour                                         | 1.28 (0.9, 1.82)                           | 1.17 (0.79, 1.72) |
| p-value for interaction                                   | 0.7196                                     | 0.9234            |
| Sustained Hypertension<br>Odds Ratio (95% CI)             |                                            |                   |
|                                                           | Model 0                                    | Model 1           |
| ≥ 1.0 ng/mL/hour                                          | 1.39 (0.65, 2.97)                          | 1.4 (0.64, 3.05)  |
| 0.51 - 0.99 ng/mL/hour                                    | 0.74 (0.3, 1.87)                           | 0.91 (0.35, 2.38) |
| ≤ 0.50 ng/mL/hour                                         | 1.5 (0.96, 2.33)                           | 1.32 (0.82, 2.14) |
| p-value for interaction                                   | 0.4014                                     | 0.7556            |
| Non-Dipping Blood Pressure Pattern<br>Odds Ratio (95% CI) |                                            |                   |
|                                                           | Model 0                                    | Model 1           |
| ≥ 1.0 ng/mL/hour                                          | 1.32 (0.87, 2)                             | 1.3 (0.84, 2.03)  |
| 0.51 - 0.99 ng/mL/hour                                    | 1.1 (0.6, 2.02)                            | 1.04 (0.55, 1.96) |
| ≤ 0.50 ng/mL/hour                                         | 0.8 (0.55, 1.16)                           | 0.68 (0.46, 1.01) |
| p-value for interaction                                   | 0.2012                                     | 0.0923            |
| White Coat Hypertension<br>Odds Ratio (95% CI)            |                                            |                   |
|                                                           | Model 0                                    | Model 1           |
| ≥ 1.0 ng/mL/hour                                          | 0.81 (0.33, 1.96)                          | 0.79 (0.33, 1.91) |
| 0.51 - 0.99 ng/mL/hour                                    | 0.6 (0.13, 2.75)                           | 0.51 (0.11, 2.27) |
| ≤ 0.50 ng/mL/hour                                         | 1.93 (0.94, 3.94)                          | 1.76 (0.83, 3.74) |
| p-value for interaction                                   | 0.1992                                     | 0.2161            |
| Masked Hypertension                                       |                                            |                   |



|                         | Odds Ratio (95% CI) |                   |
|-------------------------|---------------------|-------------------|
|                         | Model 0             | Model 1           |
| ≥ 1.0 ng/mL/hour        | 0.91 (0.56, 1.49)   | 0.98 (0.59, 1.64) |
| 0.51 - 0.99 ng/mL/hour  | 0.94 (0.48, 1.87)   | 1.13 (0.55, 2.33) |
| ≤ 0.50 ng/mL/hour       | 1.1 (0.75, 1.63)    | 1.08 (0.72, 1.63) |
| p-value for interaction | 0.8158              | 0.9403            |

Supplemental Table XI Legend:

Model 0: Unadjusted

Model 1: age, sex, education and occupation, smoking, waist circumference, physical activity, low-density lipoprotein, history of cardiovascular disease, alcohol, diabetes, hormone replacement therapy and estimated glomerular filtration rate

Abbreviations: CI = confidence interval

Clinic Hypertension = clinic SBP ≥140 mmHg or clinic DBP ≥90 mmHg; Daytime Hypertension = daytime SBP ≥ 135 mmHg or daytime DBP ≥85 mmHg, Nocturnal Hypertension = night-time SBP ≥ 120 mmHg or night-time DBP ≥ 70 mmHg; Daytime & Nocturnal hypertension = combination of Daytime and Nocturnal Hypertension; Sustained hypertension = combination of Clinic and Daytime Hypertension; Non-Dipping Pattern = <10% decrease in mean awake vs mean asleep SBP; White Coat Hypertension = absence of Daytime Hypertension with presence of Clinic Hypertension, Masked Hypertension = presence of Daytime Hypertension with absence of Clinic Hypertension.

Interpretation Example:

*Clinic Hypertension - for those with a renin activity ≤ 0.50 ng/mL/hr, a 1 unit increase in log-aldosterone was associated with 49% higher odds of clinic hypertension (Model 1).*

Supplemental Table XII: Dietary Sodium Intake by Renin Phenotype

|                                       | Median Dietary Sodium (mg) | Lower Quartile of Dietary Sodium (mg) | Upper Quartile of Dietary Sodium (mg) | p-value |
|---------------------------------------|----------------------------|---------------------------------------|---------------------------------------|---------|
| Suppressed Renin Phenotype (n=322)    | 3665.31                    | 2486.33                               | 4936.70                               | 0.0878  |
| Indeterminate Renin Phenotype (n=102) | 3460.15                    | 2598.69                               | 4531.91                               |         |
| Unsuppressed Renin Phenotype (n=174)  | 3215.38                    | 2155.08                               | 4683.26                               |         |

Supplemental Table XII Legend:

Suppressed Renin Phenotype is defined as plasma renin activity less than 0.50 ng/ml/hr; indeterminate renin phenotype is defined as plasma renin activity between 0.51 and 1.0 ng/ml/hr; unsuppressed renin phenotype is defined as plasma renin activity over 1.0 ng/ml/hr. Daily sodium intake in milligrams were evaluated using a food frequency questionnaire.<sup>30</sup>

Supplemental Table XIII. The Association of log-Aldosterone, log-Renin, and log-Aldosterone: Renin Ratio with Clinic, Awake, Asleep Systolic and Diastolic Blood Pressure and Percent Dipping with Additional Adjustment for Dietary Sodium

|                 |         | Log-Aldosterone             | Log-Plasma Renin Activity    | Log-ARR                     |
|-----------------|---------|-----------------------------|------------------------------|-----------------------------|
|                 | Model   | Beta (95% CI), p-value      | Beta (95% CI), p-value       | Beta (95% CI), p-value      |
| Clinic SBP      | Model 1 | 1.59 (-0.02, 3.20), 0.0529  | -2.84 (-3.84, -1.84), 0.0000 | 2.69 (1.73, 3.65), 0.0000   |
|                 | Model 2 | 1.37 (-0.50, 3.22), 0.1504  | -2.98 (-4.00, -1.96), 0.0000 |                             |
| Clinic DBP      | Model 1 | 1.26 (0.43, 2.09), 0.0031   | -1.03 (-1.56, -0.50), 0.0001 | 1.25 (0.75, 1.76), 0.0000   |
|                 | Model 2 | 1.54 (0.56, 2.52), 0.0021   | -1.19 (-1.73, -0.66), 0.0000 |                             |
| Awake SBP       | Model 1 | 1.19 (-0.13, 2.51), 0.0767  | -2.75 (-3.58, -1.92), 0.0000 | 2.60 (1.80, 3.39), 0.0000   |
|                 | Model 2 | 1.28 (-0.27, 2.82), 0.1048  | -2.88 (-3.73, -2.04), 0.0000 |                             |
| Awake DBP       | Model 1 | 1.1014 (0.20, 2.00), 0.0166 | -1.44 (-2.01, -0.88), 0.0000 | 1.50 (0.96, 2.04), 0.0000   |
|                 | Model 2 | 1.17 (0.12, 2.22), 0.0289   | -1.57 (-2.14, -0.99), 0.0000 |                             |
| Asleep SBP      | Model 1 | 1.52 (0.02, 3.01), 0.0472   | -3.21 (-4.17, -2.26), 0.0000 | 3.01 (2.10, 3.93), 0.0000   |
|                 | Model 2 | 1.42 (-0.35, 3.19), 0.1150  | -3.36 (-4.33, -2.39), 0.0000 |                             |
| Asleep DBP      | Model 1 | 1.48 (0.51, 2.46), 0.0030   | -1.40 (-2.03, -0.77), 0.0000 | 1.52 (0.92, 2.12), 0.0000   |
|                 | Model 2 | 1.37 (0.20, 2.54), 0.0214   | -1.55 (-2.19, -0.91), 0.0000 |                             |
| Percent Dipping | Model 1 | -0.35 (-1.15, 0.44), 0.3801 | 0.45 (-0.08, 0.99), 0.0976   | -0.42 (-0.93, 0.09), 0.1089 |
|                 | Model 2 | -0.18 (-1.18, 0.82), 0.7221 | 0.47 (-0.07, 1.02), 0.0905   |                             |

Supplemental Table XIII Legend:

Model 1: age, sex, education and occupation, smoking, waist circumference, physical activity, low-density lipoprotein, history of cardiovascular disease, alcohol intake, diabetes, hormone replacement therapy and estimated glomerular filtration rate, dietary sodium

Model 2: Model 1 + renin or aldosterone (mutually adjusted model).

Abbreviations: SBP = systolic blood pressure, DBP = diastolic blood pressure, ARR = aldosterone:renin ratio

Interpretation Example:

*Clinic SBP – a 100% higher aldosterone was associated with a 1.10 mmHg higher clinic SBP; a 100% higher plasma renin activity was associated with a 1.97 mmHg lower clinic SBP; a 100% higher aldosterone:renin ratio was associated with a 1.86 mmHg higher clinic SBP*

Supplemental Table XIV. The Association of log-Aldosterone, log-Plasma Renin Activity, and log-Aldosterone: Renin Ratio with Ambulatory Blood Pressure Phenotypes – Additional Adjustment for Dietary Sodium

|                                    |         | Log-Aldosterone           | Log-Plasma Renin Activity | Log-ARR                   |
|------------------------------------|---------|---------------------------|---------------------------|---------------------------|
|                                    | Model   | OR (95% CI), p-value      | OR (95% CI), p-value      | OR (95% CI), p-value      |
| Clinic Hypertension                | Model 1 | 1.27 (0.97, 1.66), 0.0863 | 0.66 (0.53, 0.83), 0.0004 | 1.47 (1.20, 1.80), 0.0002 |
|                                    | Model 2 | 1.28 (0.91, 1.80), 0.1495 | 0.65 (0.51, 0.81), 0.0002 |                           |
| Daytime Hypertension               | Model 1 | 1.22 (0.97, 1.53), 0.0870 | 0.62 (0.52, 0.74), 0.0000 | 1.54 (1.31, 1.82), 0.0000 |
|                                    | Model 2 | 1.25 (0.94, 1.67), 0.1286 | 0.61 (0.50, 0.73), 0.0000 |                           |
| Nocturnal Hypertension             | Model 1 | 1.33 (1.06, 1.67), 0.0129 | 0.67 (0.57, 0.79), 0.0000 | 1.51 (1.29, 1.75), 0.0000 |
|                                    | Model 2 | 1.36 (1.02, 1.80), 0.0365 | 0.65 (0.55, 0.76), 0.0000 |                           |
| Daytime and Nocturnal Hypertension | Model 1 | 1.26 (1.00, 1.60), 0.0500 | 0.60 (0.49, 0.73), 0.0000 | 1.58 (1.32, 1.87), 0.0000 |
|                                    | Model 2 | 1.25 (0.93, 1.69), 0.1440 | 0.59 (0.48, 0.72), 0.0000 |                           |
| Sustained Hypertension             | Model 1 | 1.40 (1.03, 1.91), 0.0340 | 0.54 (0.40, 0.72), 0.0000 | 1.71 (1.33, 2.20), 0.0000 |
|                                    | Model 2 | 1.34 (0.89, 2.00), 0.1606 | 0.52 (0.38, 0.70), 0.0000 |                           |
| Non-Dipping Pattern                | Model 1 | 0.98 (0.78, 1.23), 0.8631 | 0.95 (0.82, 1.10), 0.4856 | 1.02 (0.88, 1.17), 0.8160 |
|                                    | Model 2 | 0.90 (0.68, 1.20), 0.4772 | 0.96 (0.82, 1.12), 0.5861 |                           |
| White Coat Hypertension            | Model 1 | 0.96 (0.61, 1.50), 0.8570 | 0.98 (0.72, 1.32), 0.8721 | 1.04 (0.78, 1.40), 0.7719 |
|                                    | Model 2 | 1.09 (0.63, 1.88), 0.7695 | 0.97 (0.71, 1.32), 0.8311 |                           |
| Masked Hypertension                | Model 1 | 1.03 (0.80, 1.33), 0.8104 | 0.77 (0.64, 0.93), 0.0073 | 1.25 (1.06, 1.49), 0.0100 |
|                                    | Model 2 | 1.09 (0.79, 1.49), 0.6017 | 0.78 (0.63, 0.93), 0.0064 |                           |

Supplemental Table XIV Legend:

Model 1: age, sex, education and occupation, smoking, waist circumference, physical activity, low-density lipoprotein, history of cardiovascular disease, alcohol intake, diabetes, hormone replacement therapy and estimated glomerular filtration rate, dietary sodium

Model 2: Model 1 + renin or aldosterone (mutually adjusted model).

Abbreviations: ARR = aldosterone:renin ratio, OR = odds ratio, CI = confidence interval

Clinic Hypertension = clinic SBP  $\geq$ 140 mmHg or clinic DBP  $\geq$ 90 mmHg; Daytime Hypertension = daytime SBP  $\geq$  135 mmHg or daytime DBP  $\geq$ 85 mmHg, Nocturnal Hypertension = night-time SBP  $\geq$  120 mmHg or night-time DBP  $\geq$  70 mmHg; Daytime & Nocturnal hypertension = combination of Daytime and Nocturnal Hypertension; Sustained hypertension = combination of Clinic and Daytime Hypertension; Non-Dipping Pattern = <10% decrease in mean awake vs mean asleep SBP; White Coat Hypertension = absence of Daytime Hypertension with presence of Clinic Hypertension, Masked Hypertension = presence of Daytime Hypertension with absence of Clinic Hypertension.

Interpretation Example:

*Clinic Hypertension – a 1-unit higher log-aldosterone was associated with 27% higher odds of clinic hypertension; a 1-unit higher log-plasma renin activity was associated with a 34% lower odds of clinic hypertension; a 1-unit higher log-aldosterone:renin ratio was associated with a 47% higher odds of clinic hypertension*

Supplemental Figure I: Conceptual Diagram

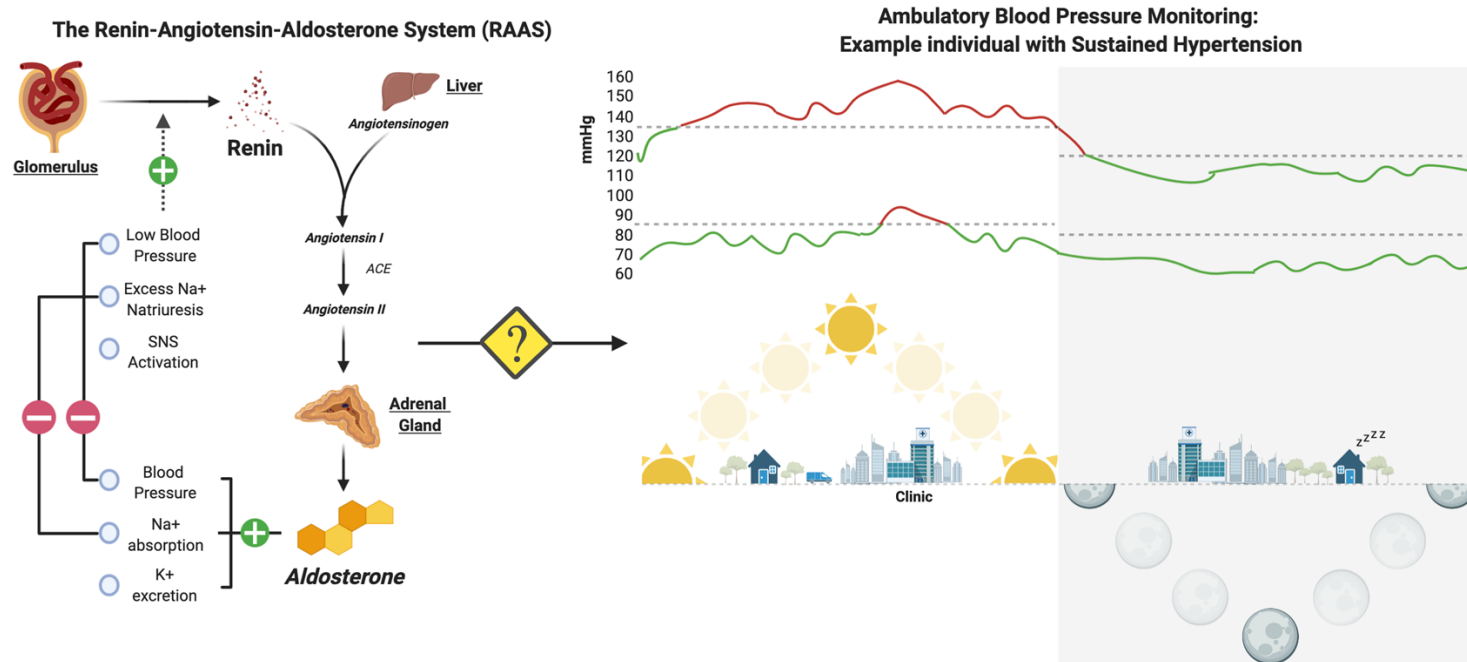

**1** Is there an association between components of the RAAS and ambulatory blood pressure metrics/phenotypes among African Americans?

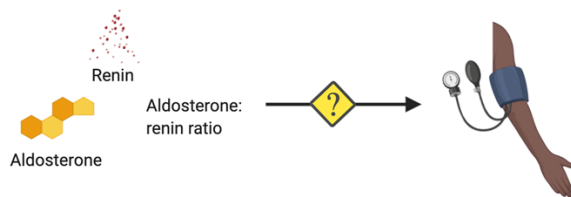

**2** Exploratory Analyses: Which component of the RAAS is driving the associations?

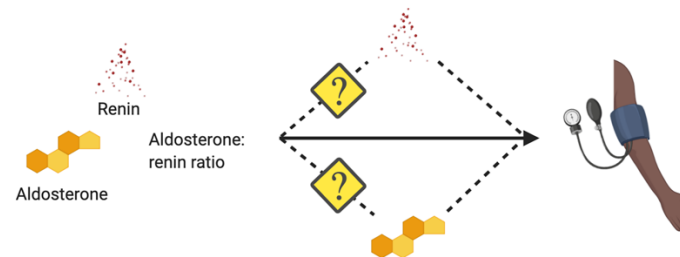

Abbreviations: mmHg = millimeters of mercury, Na+ = sodium ion, K+ = potassium ion, ACE = angiotensin-converting enzyme, SNS = sympathetic nervous system

Supplemental Figure II: Aldosterone to renin ratio by aldosterone and plasma renin activity values

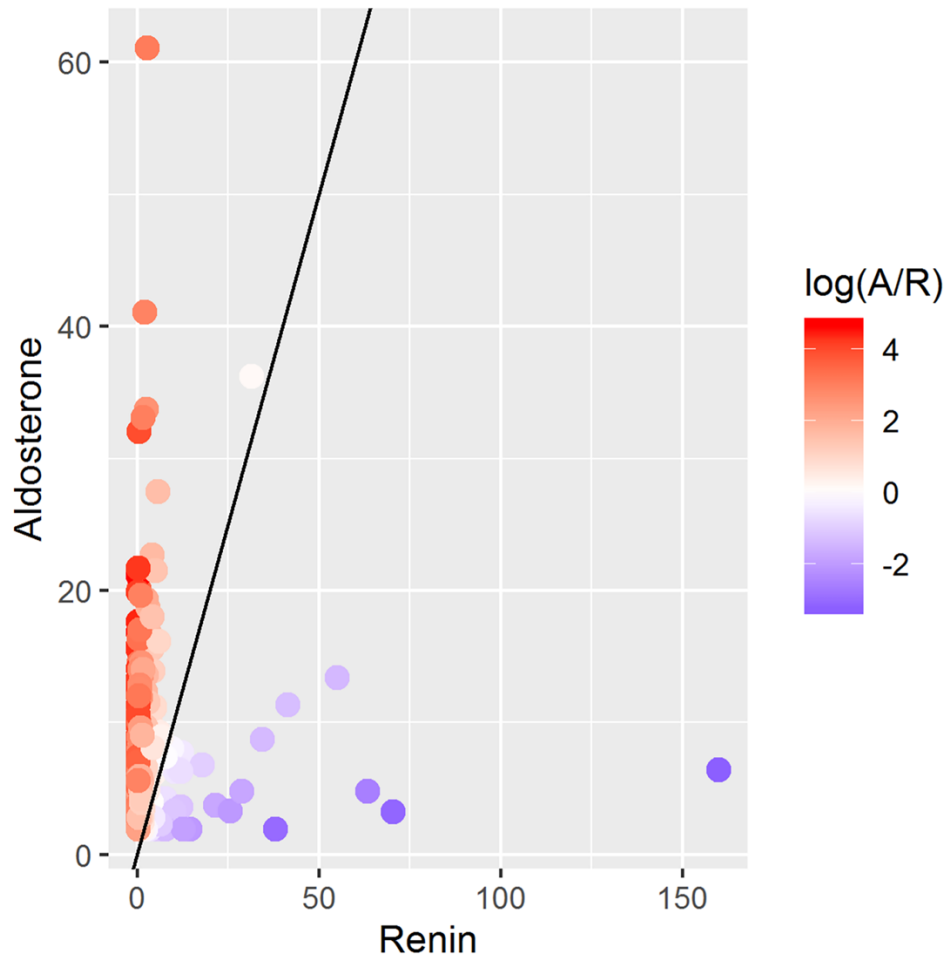

Supplemental Figure II Legend: A/R is the Aldosterone to Renin ratio, Units of aldosterone are ng/dl, units for plasma renin activity are ng/ml/hr

Interpretation: Data points were represented by colors where the highest value of  $\log(A/R)$  was bright red, the mid-range values were white and the lowest value of  $\log(A/R)$  are bright purple. The clustering of the high  $\log(A/R)$  values around the zero point for plasma renin activity indicates that the  $\log(A/R)$  is driven primarily by low plasma renin activity values.

Supplemental Figure III: The Association of Aldosterone with Clinic, Daytime, and Nighttime Systolic Blood Pressure, Diastolic Blood Pressure and Percent Dipping Stratified by Plasma Renin Activity Phenotypes

**Outcome**

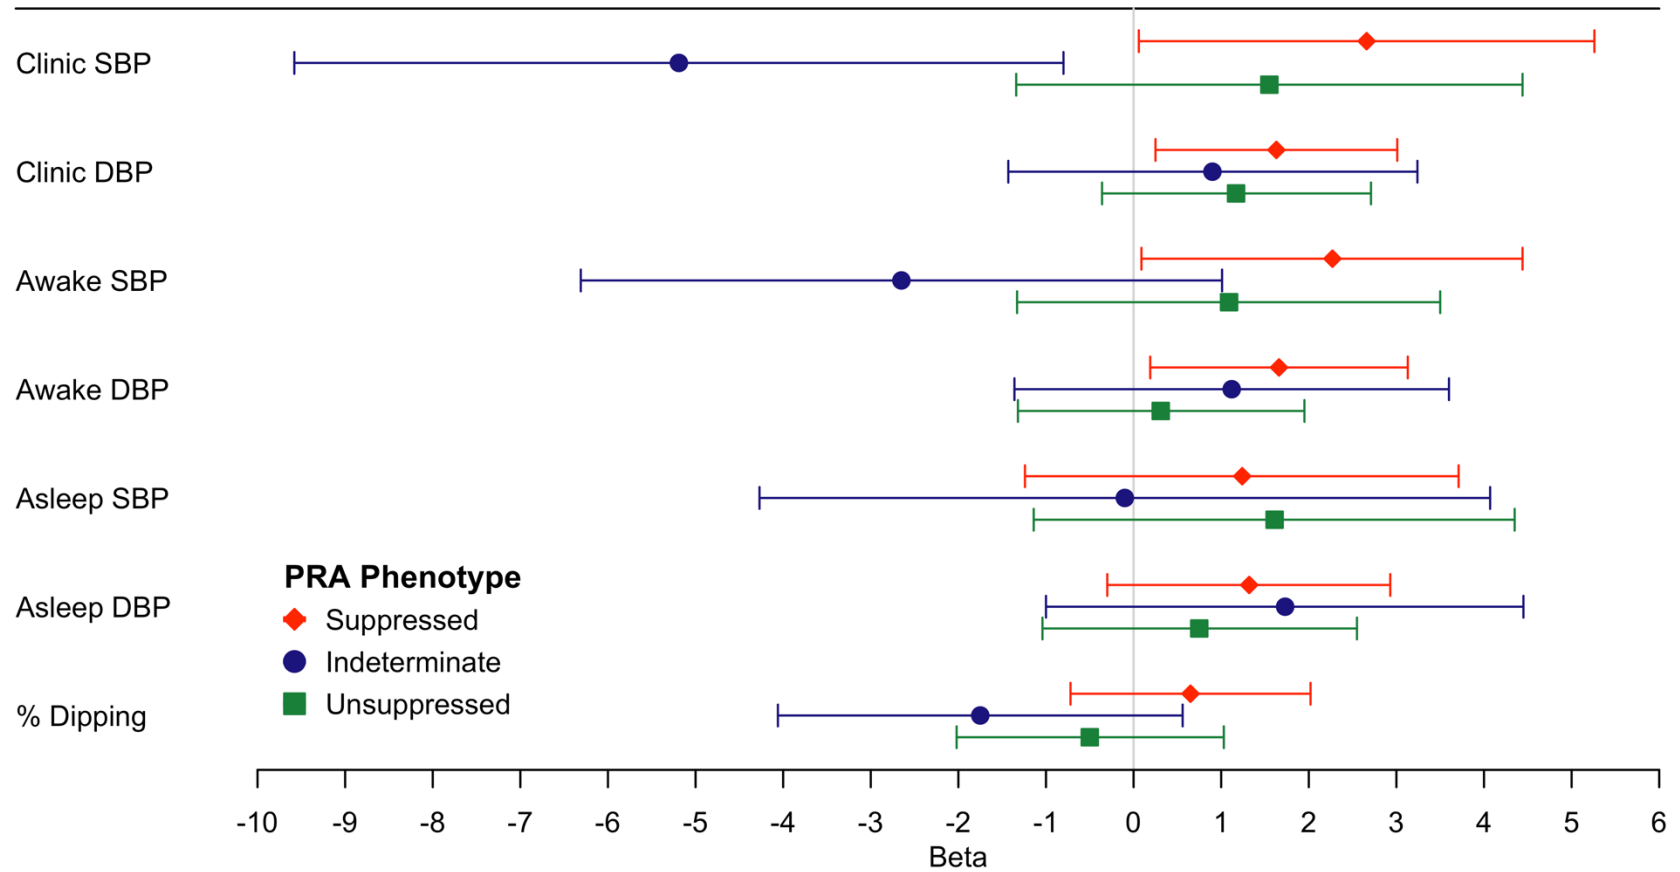

Supplemental Figure III Legend:

Model adjusted for age, sex, education and occupation, smoking, waist circumference, physical activity, low-density lipoprotein, history of cardiovascular disease, alcohol, diabetes, hormone replacement therapy and estimated glomerular filtration rate (Supplemental Table X, Model 1)

Suppressed Renin Phenotype is defined as plasma renin activity  $\leq 0.50$  ng/ml/hr; Indeterminate Renin Phenotype is defined as plasma renin activity between 0.51 and 0.99 ng/ml/hr; Unsuppressed Renin Phenotype is defined as plasma renin activity  $\geq 1.0$  ng/ml/hr.

Abbreviations: SBP = systolic blood pressure; DBP = diastolic blood pressure, PRA = plasma renin activity

Beta to mmHg Conversion:  $\text{Beta} \cdot \ln(2)$



Supplemental Figure IV: Splines of Aldosterone vs Clinic Systolic Blood Pressure Stratified by Plasma Renin Activity (PRA) Phenotype

Suppressed Renin Phenotype.  
(PRA  $\leq 0.50$  ng/mL/h)

Indeterminate Renin Phenotype.  
(PRA 0.51-0.99 ng/mL/h)

Unsuppressed Renin Phenotype  
(PRA  $\geq 1.0$  ng/mL/h)

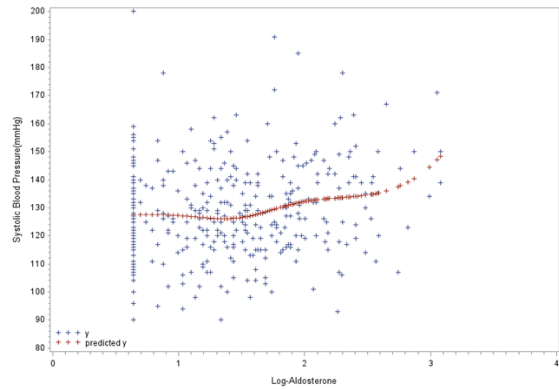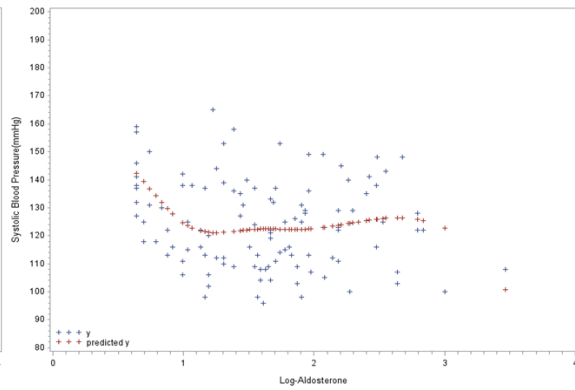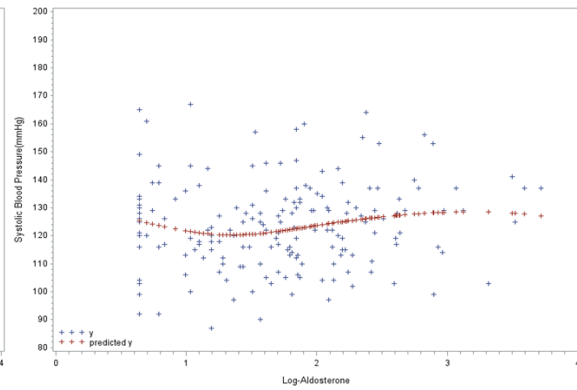

Supplemental Figure IV Legend:

Spline analyses of aldosterone vs clinic systolic blood pressure stratified by renin phenotype: the red points are the best fit values of systolic blood pressure for given aldosterone values

Interpretation: As aldosterone values increase in the suppressed renin phenotype, the expected best fit value for systolic blood pressure increases.

Supplemental Figure V: The Association of Aldosterone with Ambulatory Blood Pressure Phenotypes Stratified by Plasma Renin Activity Phenotypes

**Outcome**

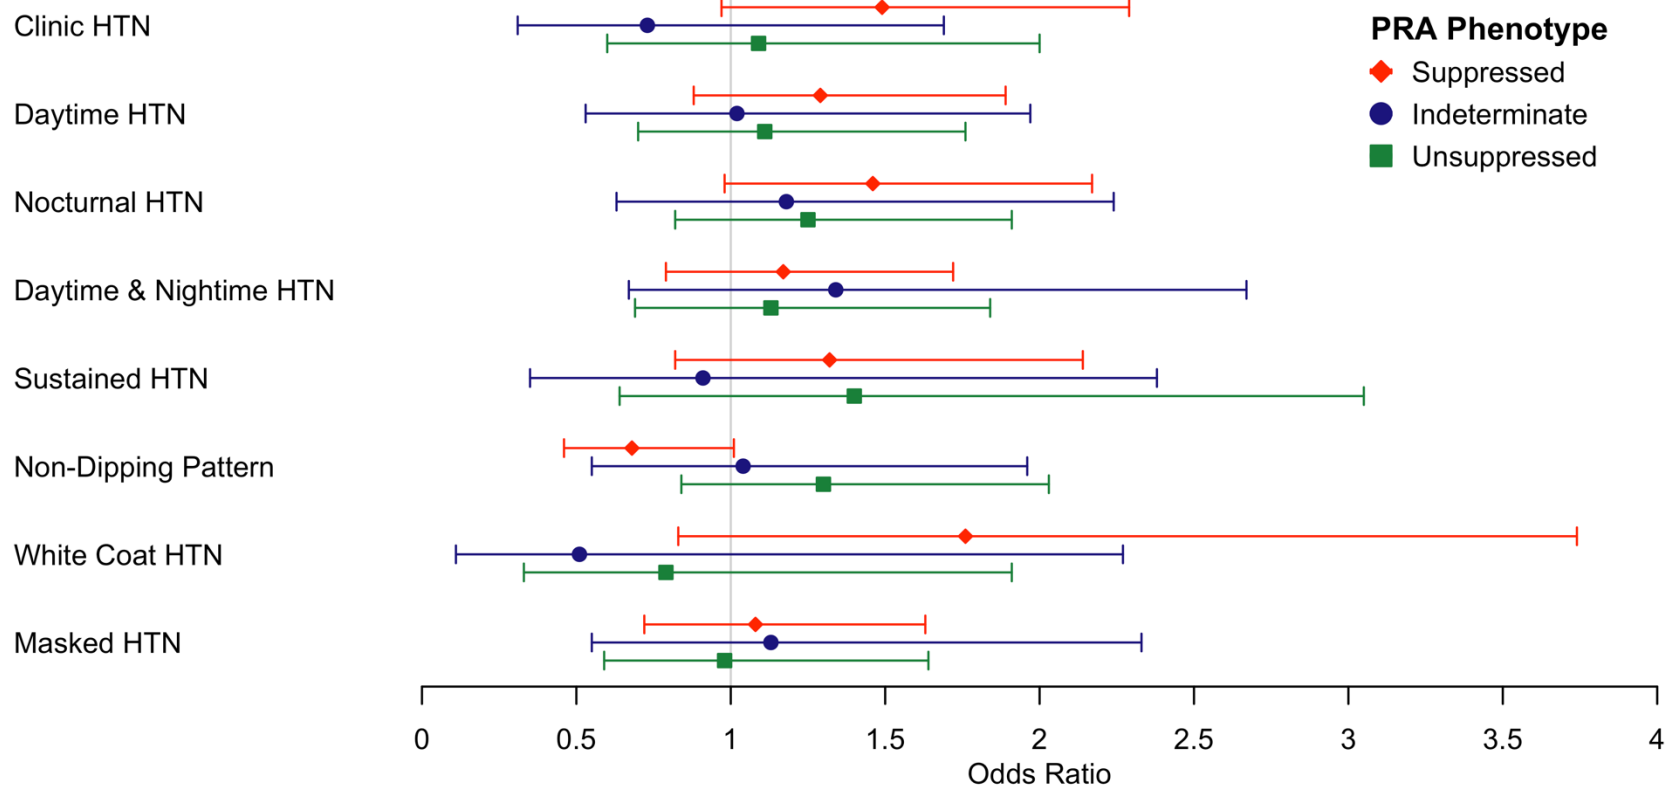

Supplemental Figure V Legend:

Model adjusted for age, sex, education and occupation, smoking, waist circumference, physical activity, low-density lipoprotein, history of cardiovascular disease, alcohol, diabetes, hormone replacement therapy and estimated glomerular filtration rate (Supplemental Table XI, Model 1)

Suppressed Renin Phenotype is defined as plasma renin activity less than 0.50 ng/ml/hr; Indeterminate Renin Phenotype is defined as plasma renin activity between 0.51 and 0.99 ng/ml/hr; Unsuppressed Renin Phenotype is defined as plasma renin activity  $\geq 1.0$  ng/ml/hr.

Abbreviations: HTN = hypertension; PRA = plasma renin activity

Clinic Hypertension = clinic SBP  $\geq 140$  mmHg or clinic DBP  $\geq 90$  mmHg; Daytime Hypertension = daytime SBP  $\geq 135$  mmHg or daytime DBP  $\geq 85$  mmHg, Nocturnal Hypertension = night-time SBP  $\geq 120$  mmHg or night-time DBP  $\geq 70$  mmHg; Daytime & Nocturnal hypertension = combination of Daytime and Nocturnal Hypertension; Sustained hypertension = combination of Clinic and Daytime Hypertension; Non-Dipping Pattern =  $< 10\%$  decrease in mean awake vs mean asleep SBP; White Coat Hypertension = absence of Daytime Hypertension with presence of Clinic Hypertension, Masked Hypertension = presence of Daytime Hypertension with absence of Clinic Hypertension.
